# Supplementary material for: Visible light response, electrical transport, and amorphization in compressed organolead iodine perovskites
Source: Royal Society of Chemistry journal article supplement (doi:10.1039/c5nr07842c), 2016-01-01
Supplement: c5nr07842c1.pdf [file c5nr07842c1.pdf]

## **Electronic Supplementary Information**

### **Visible Light Response, Electrical Transport, and Amorphization in compressed Organolead Iodine Perovskite**

Tianji Ou<sup>a</sup>, Jiejuan Yan<sup>a</sup>, Chuanhai Xiao<sup>a</sup>, Wenshu Shen<sup>a</sup>, Cailong Liu<sup>a</sup>, Xizhe Liu<sup>a</sup>, Yonghao Han<sup>a</sup>,  
Yanzhang Ma<sup>b</sup>, and Chunxiao Gao<sup>a</sup>

<sup>a</sup>State Key Laboratory of Superhard Materials, Institute of Atomic and Molecular Physics, Jilin  
University, Changchun 130012, China

<sup>b</sup>Department of Mechanical Engineering, Texas Tech University, Lubbock, Texas 79409, USA

## Sample Preparation

$\text{CH}_3\text{NH}_3\text{PbI}_3$  nanorods were prepared by coprecipitation method using spin coating technique, based on the procedure reported.<sup>1</sup> A first precursor solution were prepared by dissolving Methyl ammonium iodide ( $\text{CH}_3\text{NH}_3\text{I}$  - MAI) and lead (II) iodide ( $\text{PbI}_2$ ) at a 1:1 mole ratio in  $\gamma$ -butyrolactone at 80 °C for 2 h. Films were spin-coated at 2000 rpm for 20 s and annealed at 80 °C for 10 minutes in the glovebox.  $\text{CH}_3\text{NH}_3\text{I}$  and  $\text{PbI}_2$  were dissolved in anhydrous N, Ndimethyl formamide (DMF) in a 1:1 molar ratio, at 0.88 M of each reagent to give a perovskite second precursor solution. The above films were again spin coated at 2000 rpm for 20 s using the second precursor solution. Finally  $\text{CH}_3\text{NH}_3\text{PbI}_3$  nanorods are obtained and these spin coated films were annealed at 80 °C for 30 min in glovebox. The samples were stored in sealed glass tube in glovebox for further characterizations.

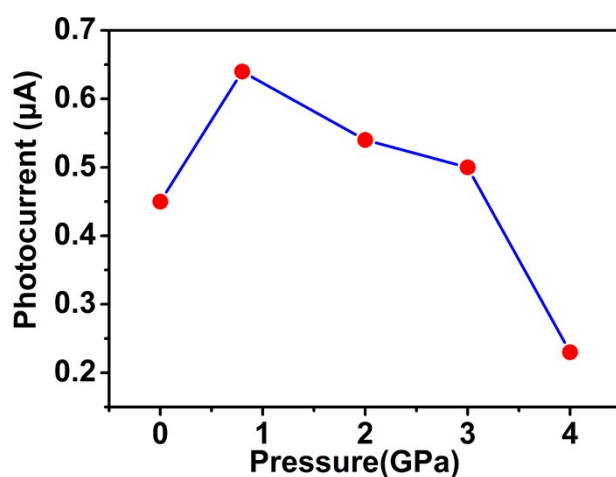

Figure S1. The pressure dependence of photocurrents.

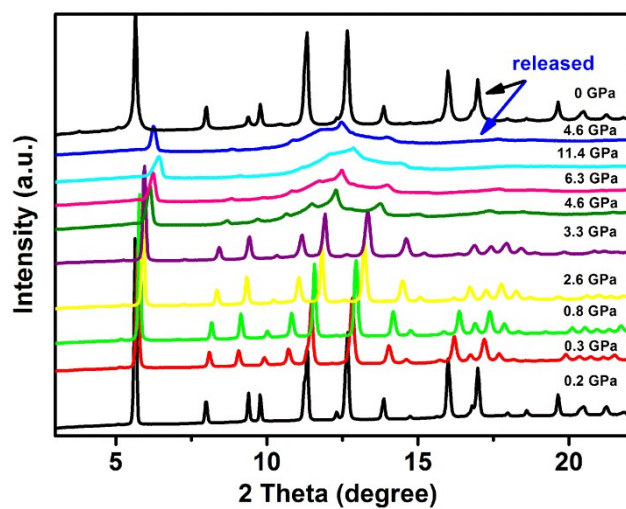

Figure S2. Synchrotron XRD patterns of MAPbI<sub>3</sub> with silicone oil as the pressure transmitting medium obtained during compression up to 11.4 GPa and decompression.

## References

1. N. Rajamanickam, S. Rajashabala and K. Ramachandran, *AIP Conf. Proc.*, 2015, **1665**.080034
